# Supplementary material
Source: Royal Society of Chemistry journal article supplement (doi:10.1039/d5tc04393j)
Supplement: d5tc04393j1.pdf [file d5tc04393j1.pdf]

**Supplementary information**

**Comparative Optical Characterization of CsPbBr<sub>3</sub> Quantum Dots and  
CVD-Grown CsPbBr<sub>3</sub> Mircoplates**

Ga-Eun Kim<sup>a</sup>, Minjin Kim<sup>a</sup>, Byung Joon Moon<sup>b</sup>, Geol Moon<sup>c</sup>, Tae-Wook Kim<sup>d</sup>,

Sang-Wan Ryu<sup>c</sup>, Sang Hyun Lee<sup>a,\*</sup>

<sup>a</sup>School of Chemical Engineering, Chonnam National University, 77 Yongbong-ro, Buk-gu,  
Gwangju 61186, Republic of Korea

<sup>b</sup>Functional Composite Materials Research Center, Institute of Advanced Composite  
Materials, Korea Institute of Science and Technology, Jeollabuk-do 55324, Republic of  
Korea

<sup>c</sup>Department of Physics, Chonnam National University, 77 Yongbong-ro, Buk-gu, Gwangju  
61186, Republic of Korea

<sup>d</sup>Department of Flexible and Printable Electronics, LANL-JBNU Engineering Institute-Korea,  
Jeonbuk National University, 567 Baekje-daero, Deokjin-gu, Jeonju 54896, Republic of  
Korea

\*Corresponding Author: Sang Hyun Lee

Tel: +82-62-530-1885, Fax: +82-62-530-1899

E-mail: [leeshyun@jnu.ac.kr](mailto:leeshyun@jnu.ac.kr)

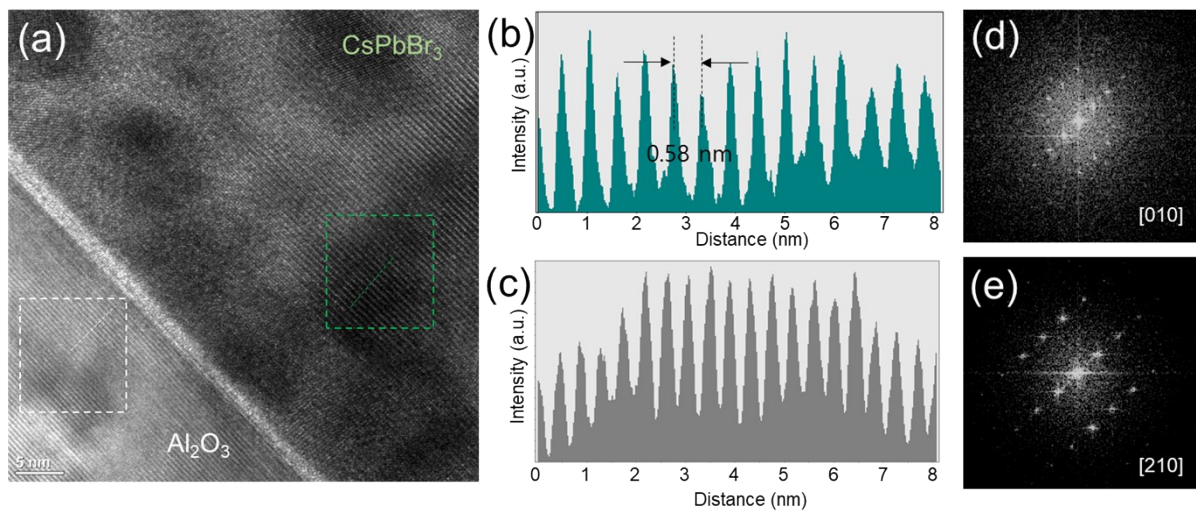

**Figure S1.** (a) Image of the interface between a CsPbBr<sub>3</sub> microplate and the *c*-plane Al<sub>2</sub>O<sub>3</sub> substrate. (b, c) Intensity line profiles for the boxed regions in CsPbBr<sub>3</sub> (b, green) and Al<sub>2</sub>O<sub>3</sub> (c, gray), indicating the lattice fringes of each material.

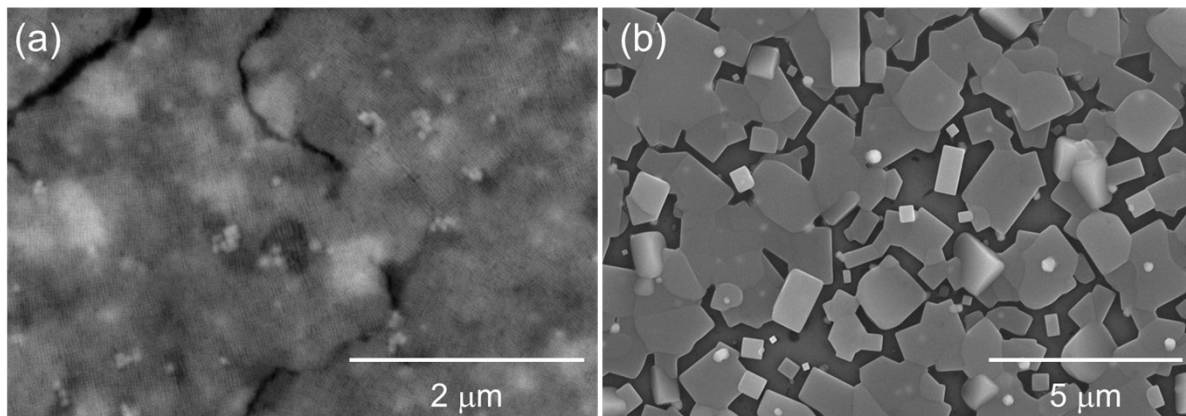

**Figure S2.** High-resolution FE-SEM image of CsPbBr<sub>3</sub> (a) QDs coated on Si substrate and (b) microplates on c-Al<sub>2</sub>O<sub>3</sub> grown by CVD.

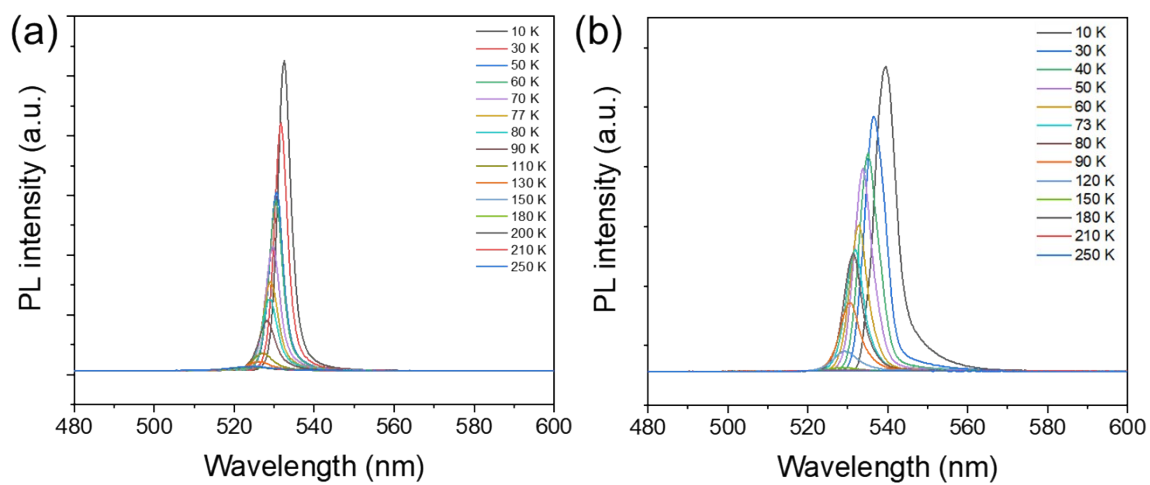

**Figure S3.** Temperature dependent PL spectra in the range of 10–250 K for (a) QDs and (b) microparticles.

**Table S1.** Biexponential decay parameters for room temperature TRPL decay for CsPbBr<sub>3</sub> QDs and nanoplates

|             | $A_1$ | $\tau_1$ (ns) | $A_2$ | $\tau_2$ (ns) | $\tau_{ave}$ (ns) |
|-------------|-------|---------------|-------|---------------|-------------------|
| QDs         | 0.330 | 4.550         | 0.021 | 16.476        | 6.78              |
| Microplates | 0.210 | 5.070         | 0.061 | 12.385        | 8.11              |

Here,  $\tau_1$  and  $\tau_2$  are the fast and slow decay components, respectively, and  $A_1$  and  $A_2$  are their amplitudes. The average decay time  $\tau_{ave}$  was determined from the equation

$$\tau_{ave} = (A_1\tau_1^2 + A_2\tau_2^2)/(A_1\tau_1 + A_2\tau_2).$$
